# Supplementary material for: Joint association of TyG index and high sensitivity C-reactive protein with cardiovascular disease: a national cohort study
Source: PubMed Central journal article supplement (PMC11077847; doi:10.1186/s12933-024-02244-9), 2024-05-07
Supplement: 12933_2024_2244_MOESM1_ESM.pdf [file 12933_2024_2244_MOESM1_ESM.pdf]

## Supplementary File

### Joint association of TyG index and high sensitivity C-reactive protein with cardiovascular disease: a national cohort study

**Table S1:** Baseline characteristics of the study participants

| Characteristics                      | Group 1     | Group 2     | Group 3     | Group 4     |
|--------------------------------------|-------------|-------------|-------------|-------------|
| Participants, No.                    | 2412        | 1917        | 1826        | 2503        |
| Age, years, mean (SD)                | 57.78(8.96) | 59.58(9.38) | 57.77(8.64) | 59.18(8.92) |
| Sex, Female, n (%)                   | 1165(48.3)  | 1016(53.0)  | 770(42.2)   | 1037(41.4)  |
| Residence, n (%)                     |             |             |             |             |
| Rural                                | 2023(84.0)  | 1586(82.7)  | 1476(81.1)  | 1891(75.6)  |
| Urban                                | 386(16.0)   | 331(17.3)   | 344(18.9)   | 611(24.4)   |
| Marriage, married, n (%)             | 2170(90.0)  | 1696(88.5)  | 1657(90.7)  | 2231(89.1)  |
| Educational level, n (%)             |             |             |             |             |
| Primary                              | 1632(67.7)  | 1300(67.8)  | 1233(67.6)  | 1668(66.7)  |
| Secondary                            | 511(21.2)   | 409(21.3)   | 399(21.9)   | 525(21.0)   |
| Third                                | 269(11.2)   | 207(10.8)   | 191(10.5)   | 308(12.3)   |
| Smoking status, n (%)                |             |             |             |             |
| Never                                | 1451(60.3)  | 1115(58.2)  | 1078(59.1)  | 1513(60.5)  |
| Former                               | 162(6.7)    | 134(7.0)    | 134(7.3)    | 199(8.0)    |
| Current                              | 794(33.0)   | 667(34.8)   | 612(33.6)   | 789(31.5)   |
| Current drinking, n (%)              | 817(34.0)   | 703(36.7)   | 614(33.7)   | 857(34.3)   |
| BMI <sup>a</sup> , kg/m <sup>2</sup> |             |             |             |             |
| Continuous                           | 23.89(6.20) | 23.56(5.90) | 23.67(5.91) | 23.85(6.05) |
| <23.9                                | 1129(56.5)  | 896(56.7)   | 851(56.6)   | 1142(55.4)  |
| 24-27.9                              | 419(21.0)   | 341(21.6)   | 332(22.1)   | 467(22.6)   |
| ≥28                                  | 452(22.6)   | 342(21.7)   | 320(21.3)   | 453(22.0)   |
| Hypertension, n (%)                  | 1045(43.3)  | 809(42.2)   | 781(42.8)   | 1069(42.7)  |
| Diabetes, n (%)                      | 216(9.0)    | 170(8.9)    | 419(22.9)   | 772(30.8)   |

Data are presented as the mean (SD) or number (%), as appropriate.

Abbreviations: SD, standard deviation; BMI, body mass index; TyG, triglyceride-glucose index; hsCRP: high-sensitivity C-reactive protein.

<sup>a</sup> Calculated as weight in kilograms divided by height in meters squared.

N of missing: BMI (n=1514); residence (n=10); smoking (n=10); drinking (n=13); education (n=6).

Group 1: TyG < median & hs-CRP <1 mg/L; Group 2: TyG < median & hs-CRP ≥1 mg/L; Group 3: TyG ≥ median & hs-CRP <1 mg/L; Group 4: TyG ≥ median & hs-CRP ≥1 mg/L.

**Table S2:** Risk of cardiovascular disease upon individual exposure stratified by TyG index and hsCRP

|               | Model 1            |         | Model 2            |         |
|---------------|--------------------|---------|--------------------|---------|
|               | HR (95% CI)        | P value | HR (95% CI)        | P value |
| TyG < median  | Ref                |         |                    |         |
| TyG ≥ median  |                    |         |                    |         |
| CVD           | 1.17(1.083-1.264)  | <0.001  | 1.146(1.049-1.252) | 0.003   |
| CHD           | 1.177(1.078-1.286) | <0.001  | 1.128(1.019-1.248) | 0.020   |
| Stroke        | 1.146(1.001-1.312) | 0.049   | 1.159(0.995-1.35)  | 0.058   |
| hsCRP <1 mg/L | Ref                |         |                    |         |
| hsCRP ≥1 mg/L |                    |         |                    |         |
| CVD           | 1.238(1.145-1.337) | <0.001  | 1.167(1.071-1.272) | <0.001  |
| CHD           | 1.263(1.156-1.380) | <0.001  | 1.176(1.065-1.297) | 0.001   |
| Stroke        | 1.182(1.032-1.354) | 0.016   | 1.199(1.034-1.391) | 0.016   |

Abbreviations: HR, hazard ratio; CI, confidence interval; BMI, body mass index; TyG, triglyceride-glucose index; hsCRP: high-sensitivity C-reactive protein; CVD: cardiovascular disease; CHD: coronary heart disease.

Group 1: TyG < median & hs-CRP <1 mg/L; Group 2: TyG < median & hs-CRP ≥1 mg/L; Group 3: TyG ≥ median & hs-CRP <1 mg/L; Group 4: TyG ≥ median & hs-CRP ≥1 mg/L. Median of TyG: 8.6

Model 1: age and sex adjusted; model 2: age, sex, residence, marriage, education level, BMI level, smoking status, current drinking, hypertension, diabetes were adjusted.

**Table S3:** Risk of cardiovascular disease upon co-exposure stratified by TyG index and hsCRP

|               | Model 1            |         | Model 2            |         |
|---------------|--------------------|---------|--------------------|---------|
|               | HR (95% CI)        | P value | HR (95% CI)        | P value |
| <b>CVD</b>    |                    |         |                    |         |
| Group 1       | Ref                |         |                    |         |
| Group 2       | 1.210(1.066-1.374) | 0.003   | 1.192(1.036-1.370) | 0.014   |
| Group 3       | 1.284(1.096-1.503) | 0.002   | 1.196(1.001-1.430) | 0.049   |
| Group 4       | 1.157(1.030-1.299) | 0.014   | 1.170(1.029-1.330) | 0.016   |
| Group 5       | 1.279(1.139-1.436) | <0.001  | 1.200(1.054-1.368) | 0.006   |
| Group 6       | 1.613(1.410-1.846) | <0.001  | 1.515(1.300-1.766) | <0.001  |
| <b>CHD</b>    |                    |         |                    |         |
| Group 1       | Ref                |         |                    |         |
| Group 2       | 1.232(1.065-1.426) | 0.005   | 1.189(1.012-1.397) | 0.035   |
| Group 3       | 1.415(1.186-1.688) | <0.001  | 1.362(1.118-1.659) | 0.002   |
| Group 4       | 1.194(1.045-1.363) | 0.009   | 1.191(1.028-1.379) | 0.020   |
| Group 5       | 1.321(1.157-1.507) | <0.001  | 1.208(1.040-1.403) | 0.013   |
| Group 6       | 1.644(1.410-1.918) | <0.001  | 1.481(1.241-1.766) | <0.001  |
| <b>Stroke</b> |                    |         |                    |         |
| Group 1       | Ref                |         |                    |         |
| Group 2       | 1.130(0.909-1.405) | 0.271   | 1.196(0.946-1.513) | 0.135   |
| Group 3       | 1.012(0.758-1.350) | 0.936   | 0.955(0.690-1.321) | 0.780   |
| Group 4       | 1.047(0.855-1.283) | 0.656   | 1.069(0.855-1.337) | 0.559   |
| Group 5       | 1.215(0.995-1.484) | 0.056   | 1.239(0.993-1.546) | 0.058   |
| Group 6       | 1.468(1.160-1.858) | 0.001   | 1.534(1.183-1.989) | 0.001   |

Abbreviations: HR, hazard ratio; CI, confidence interval; BMI, body mass index; TyG, triglyceride-glucose index; hsCRP: high-sensitivity C-reactive protein; CVD: cardiovascular disease; CHD: coronary heart disease.

Group 1: TyG < median & hs-CRP <1 mg/L; Group 2: TyG < median & hs-CRP 1-3 mg/L; Group 3: TyG < median & hs-CRP ≥3 mg/L; Group 4: TyG ≥ median & hs-CRP ≥1 mg/L; Group 5: TyG ≥ median & hs-CRP 1-3 mg/L; Group 6: TyG ≥ median & hs-CRP ≥3 mg/L. Median of TyG: 8.6.

Model 1: age and sex adjusted; model 2: age, sex, residence, marriage, education level, BMI level, smoking status, current drinking, hypertension, diabetes were adjusted.

**Table S4:** Sensitivity analyses of co-exposure for TyG index and hsCRP in terms of data missing

|               | Sensitivity analysis 1 |         | Sensitivity analysis 2 |         |
|---------------|------------------------|---------|------------------------|---------|
|               | HR (95% CI)            | P value | HR (95% CI)            | P value |
| <b>CVD</b>    |                        |         |                        |         |
| Group 1       | Ref                    |         |                        |         |
| Group 2       | 1.193(1.053-1.351)     | 0.006   | 1.229(1.098-1.376)     | <0.001  |
| Group 3       | 1.168(1.027-1.327)     | 0.018   | 1.138(1.012-1.279)     | 0.03    |
| Group 4       | 1.300(1.155-1.462)     | <0.001  | 1.341(1.205-1.491)     | <0.001  |
| <b>CHD</b>    |                        |         |                        |         |
| Group 1       | Ref                    |         |                        |         |
| Group 2       | 1.245(1.079-1.436)     | 0.003   | 1.284(1.129-1.461)     | <0.001  |
| Group 3       | 1.189(1.026-1.377)     | 0.021   | 1.171(1.024-1.339)     | 0.021   |
| Group 4       | 1.294(1.130-1.481)     | <0.001  | 1.368(1.211-1.546)     | <0.001  |
| <b>Stroke</b> |                        |         |                        |         |
| Group 1       | Ref                    |         |                        |         |
| Group 2       | 1.115(0.901-1.380)     | 0.318   | 1.092(0.898-1.328)     | 0.378   |
| Group 3       | 1.067(0.854-1.335)     | 0.568   | 1.027(0.837-1.260)     | 0.801   |
| Group 4       | 1.333(1.093-1.628)     | 0.005   | 1.262(1.051-1.516)     | 0.013   |

Abbreviations: HR, hazard ratio; CI, confidence interval; BMI, body mass index; TyG, triglyceride-glucose index; hsCRP: high-sensitivity C-reactive protein; CVD: cardiovascular disease; CHD: coronary heart disease.

Group 1: TyG < median & hs-CRP <1 mg/L; Group 2: TyG < median & hs-CRP ≥1 mg/L; Group 3: TyG ≥ median & hs-CRP <1 mg/L; Group 4: TyG ≥ median & hs-CRP ≥1 mg/L. Median of TyG index: 8.6

Analyses were adjusted for age, sex, residence, marriage, education level, BMI level, smoking status, current drinking, hypertension, diabetes were adjusted.

Sensitivity analysis 1 was performed among 7 126 participants without any missing data; sensitivity analysis 2 were performed using multiple imputed analyses (5 iterations) by Markov chain Monte Carlo method.

Number of missing: BMI (n=1514); residence (n=10); smoking (n=10); drinking (n=13); education (n=6).

**Table S5:** Risk of cardiovascular disease upon coexposure stratified by the TyG index and hsCRP among those free of diabetes (7081 participants)

|               | Model 1            |         | Model 2            |         |
|---------------|--------------------|---------|--------------------|---------|
|               | HR (95% CI)        | P value | HR (95% CI)        | P value |
| <b>CVD</b>    |                    |         |                    |         |
| Group 1       | Ref                |         |                    |         |
| Group 2       | 1.255(1.115-1.413) | <0.001  | 1.227(1.077-1.398) | 0.002   |
| Group 3       | 1.15(1.012-1.308)  | 0.033   | 1.174(1.02-1.352)  | 0.026   |
| Group 4       | 1.341(1.193-1.507) | <0.001  | 1.303(1.144-1.483) | <0.001  |
| <b>CHD</b>    |                    |         |                    |         |
| Group 1       | Ref                |         |                    |         |
| Group 2       | 1.297(1.132-1.487) | <0.001  | 1.261(1.085-1.465) | 0.003   |
| Group 3       | 1.215(1.05-1.406)  | 0.009   | 1.229(1.047-1.444) | 0.012   |
| Group 4       | 1.389(1.215-1.588) | <0.001  | 1.305(1.124-1.516) | <0.001  |
| <b>Stroke</b> |                    |         |                    |         |
| Group 1       | Ref                |         |                    |         |
| Group 2       | 1.103(0.898-1.354) | 0.35    | 1.132(0.906-1.416) | 0.275   |
| Group 3       | 0.942(0.748-1.187) | 0.615   | 0.988(0.768-1.271) | 0.927   |
| Group 4       | 1.221(0.997-1.495) | 0.053   | 1.323(1.062-1.648) | 0.013   |

Abbreviations: HR, hazard ratio; CI, confidence interval; BMI, body mass index; TyG, triglyceride-glucose index; hsCRP: high-sensitivity C-reactive protein; CVD: cardiovascular disease; CHD: coronary heart disease.

Group 1: TyG < median & hs-CRP <1 mg/L; Group 2: TyG < median & hs-CRP ≥1 mg/L; Group 3: TyG ≥ median & hs-CRP <1 mg/L; Group 4: TyG ≥ median & hs-CRP ≥1 mg/L. Median of TyG index: 8.6

Analyses were adjusted for age, sex, residence, marriage, education level, BMI level, smoking status, current drinking, hypertension were adjusted.

**Table S6:** Risk of cardiovascular disease upon coexposure stratified by the TyG index and hsCRP further adjusting for medication uses

|         | CVD                |       | CHD                |       | Stroke             |       |
|---------|--------------------|-------|--------------------|-------|--------------------|-------|
|         | HR (95% CI)        | P     | HR (95% CI)        | P     | HR (95% CI)        | P     |
| Group 1 | Ref                |       |                    |       |                    |       |
| Group 2 | 1.191(1.051-1.349) | 0.006 | 1.243(1.078-1.434) | 0.003 | 1.11(0.896-1.374)  | 0.338 |
| Group 3 | 1.183(1.042-1.344) | 0.009 | 1.207(1.043-1.397) | 0.011 | 1.083(0.867-1.351) | 0.483 |
| Group 4 | 1.332(1.187-1.494) | 0.001 | 1.327(1.163-1.515) | 0.001 | 1.375(1.132-1.67)  | 0.001 |

Abbreviations: HR, hazard ratio; CI, confidence interval; BMI, body mass index; TyG, triglyceride-glucose index; hsCRP: high-sensitivity C-reactive protein; CVD: cardiovascular disease; CHD: coronary heart disease.

Group 1: TyG < median & hs-CRP <1 mg/L; Group 2: TyG < median & hs-CRP ≥1 mg/L; Group 3: TyG ≥ median & hs-CRP <1 mg/L; Group 4: TyG ≥ median & hs-CRP ≥1 mg/L. Median of TyG index: 8.6

Analyses were adjusted for age, sex, residence, marriage, education level, BMI level, smoking status, current drinking, hypertension, antihypertensive medication, diabetes and antidiabetic medication were adjusted.

**Figure S1:** Flowchart and follow-up setting of this current study

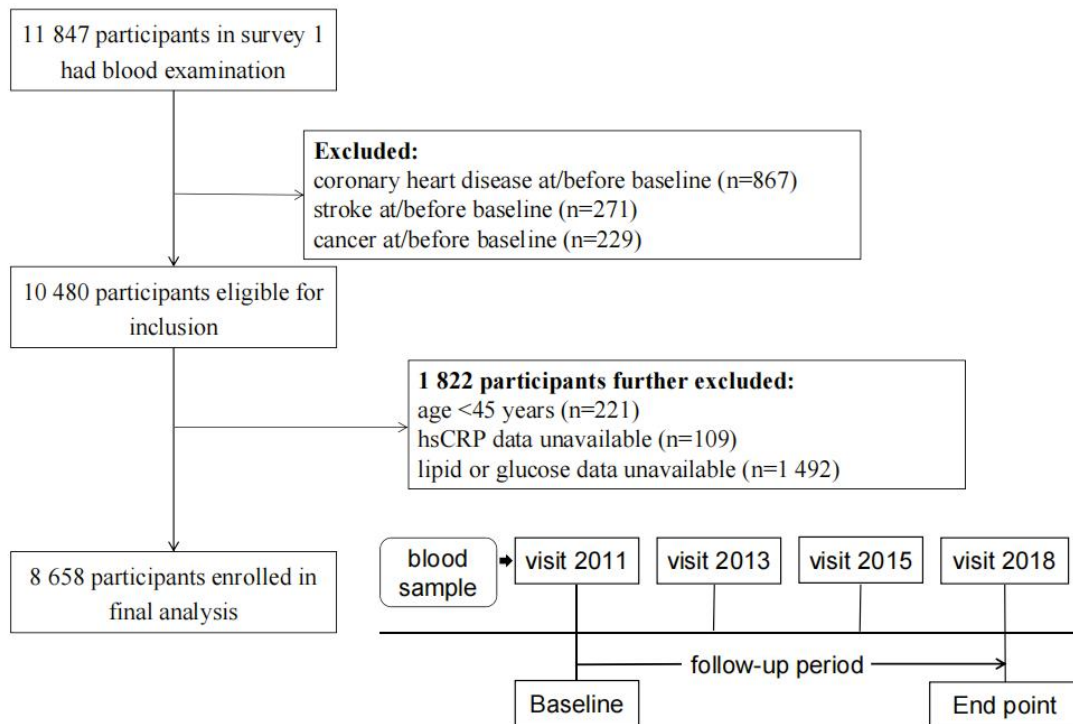

**Figure S2:** Co-distribution of TyG index and hsCRP stratified by incident cardiovascular diseases or not

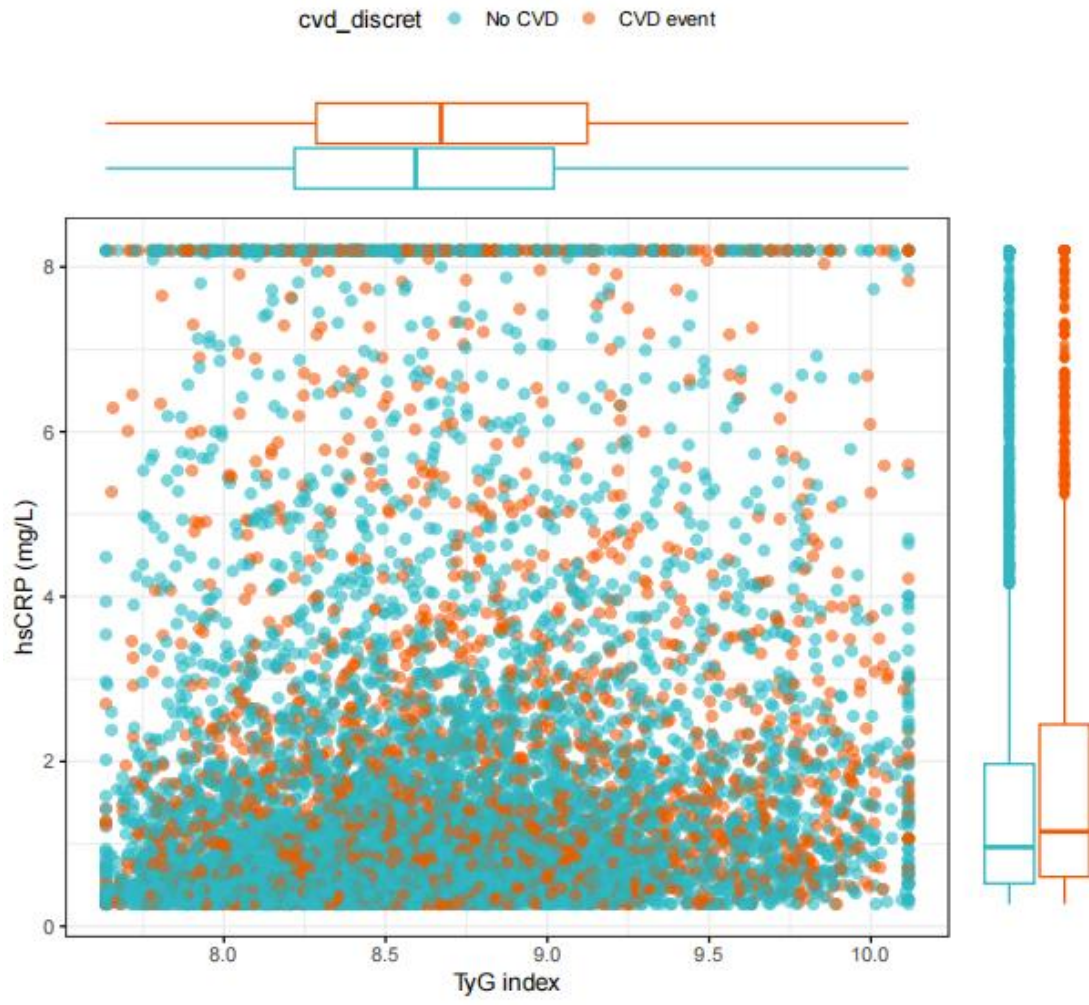

Abbreviations: TyG, triglyceride-glucose index; hsCRP: high-sensitivity C-reactive protein; CVD: cardiovascular disease



**Figure S3:** K-M plot of coronary heart disease and stroke by TyG index and hsCRP level

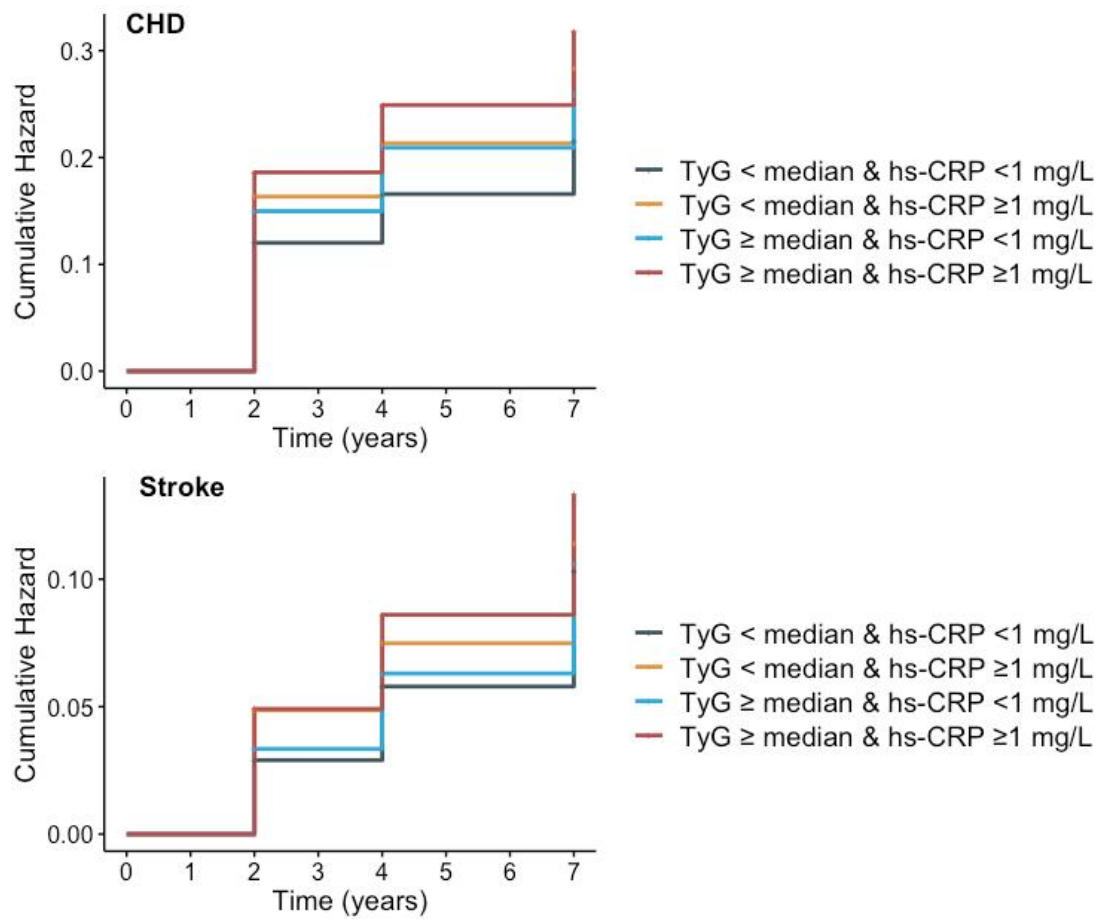

Abbreviations: TyG, triglyceride-glucose index; hsCRP: high-sensitivity C-reactive protein; median of TyG index: 8.6

**Figure S4:** Age-associated risk of TyG index and hsCRP for cardiovascular diseases onset

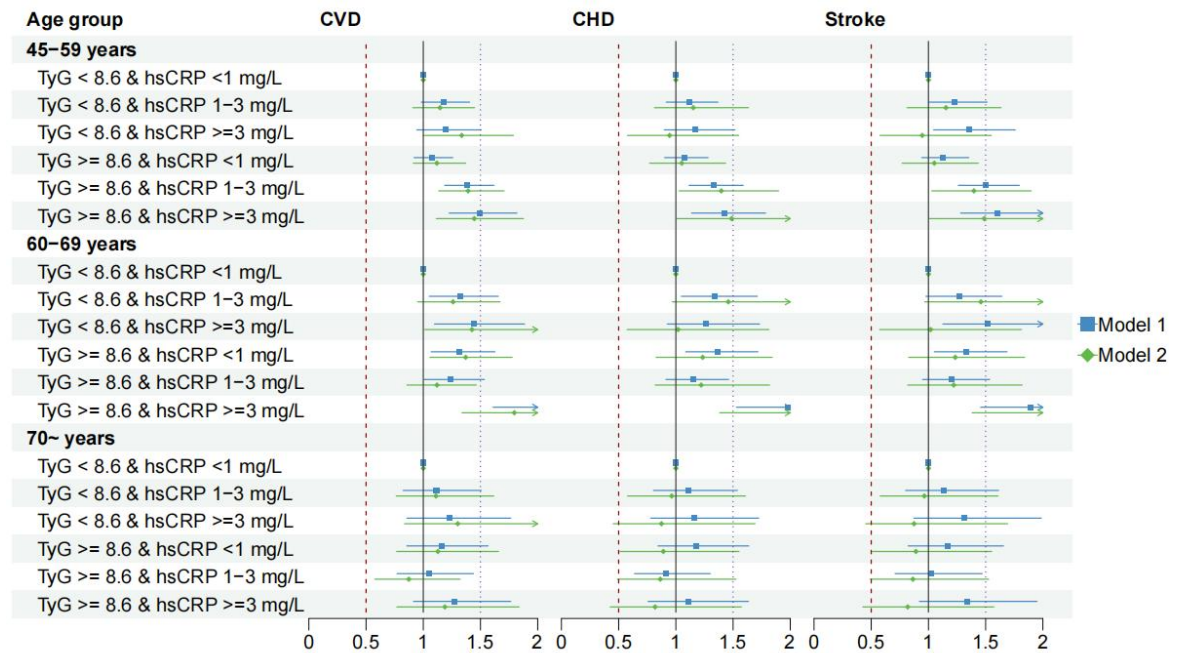

Abbreviations: HR, hazard ratio; CI, confidence interval; BMI, body mass index; TyG, triglyceride-glucose index; hsCRP: high-sensitivity C-reactive protein; CVD: cardiovascular disease; CHD: coronary heart disease.

Number of participants: 45-59 years (n=5 015); 60-69 years (n=2 495); 70~ years (n=1 148)

Dots and lines represent the HR and 95% CI.

Model 1: age and sex adjusted; model 2: age, sex, residence, marriage, education level, BMI level, smoking status, current drinking, hypertension, diabetes were adjusted.

**Figure S5:** Mutual mediation effects of TyG index and hsCRP on coronary heart disease

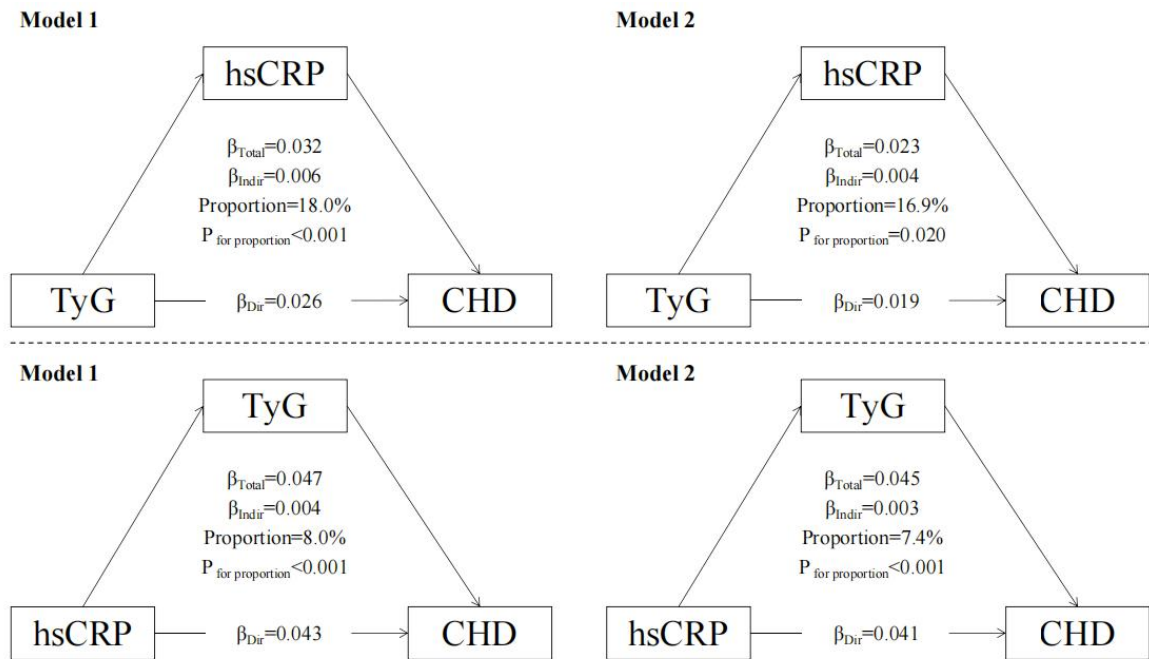

Abbreviations: TyG, triglyceride-glucose index; hsCRP: high-sensitivity C-reactive protein

Model 1: age and sex adjusted; model 2: age, sex, residence, marriage, education level, BMI level, smoking status, current drinking, hypertension, diabetes were adjusted.

**Figure S6:** Mutual mediation effects of TyG index and hsCRP on stroke

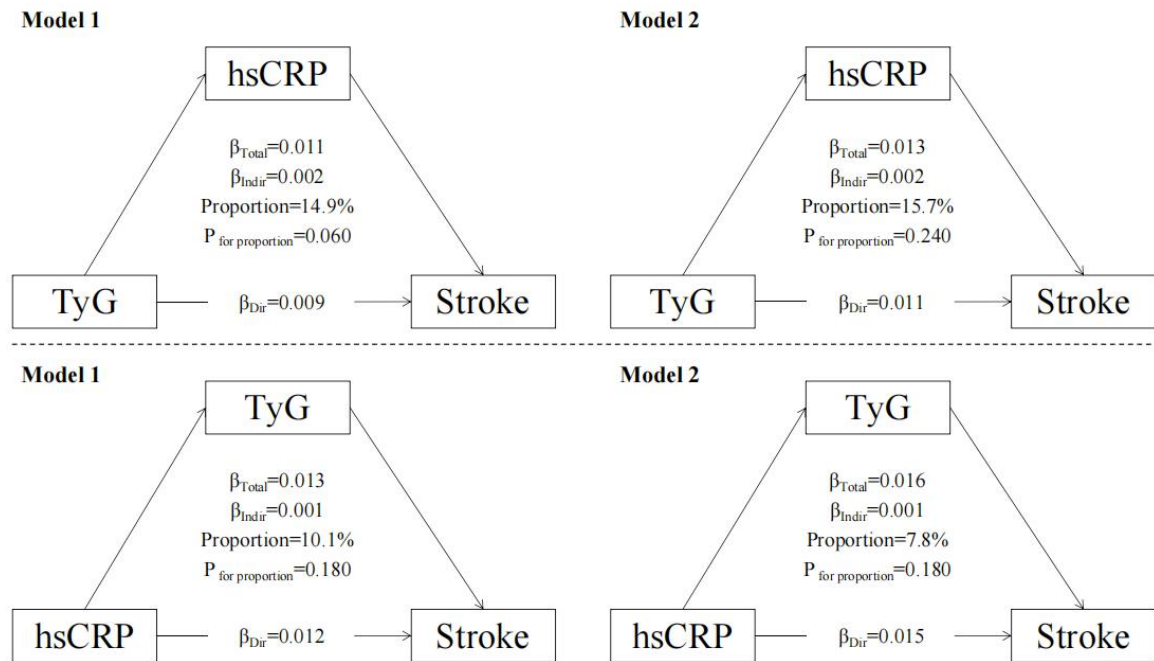

Abbreviations: TyG, triglyceride-glucose index; hsCRP: high-sensitivity C-reactive protein

Model 1: age and sex adjusted; model 2: age, sex, residence, marriage, education level, BMI level, smoking status, current drinking, hypertension, diabetes were adjusted.

**Figure S7:** Predictive capacity of TyG index and hsCRP on the cardiovascular risk

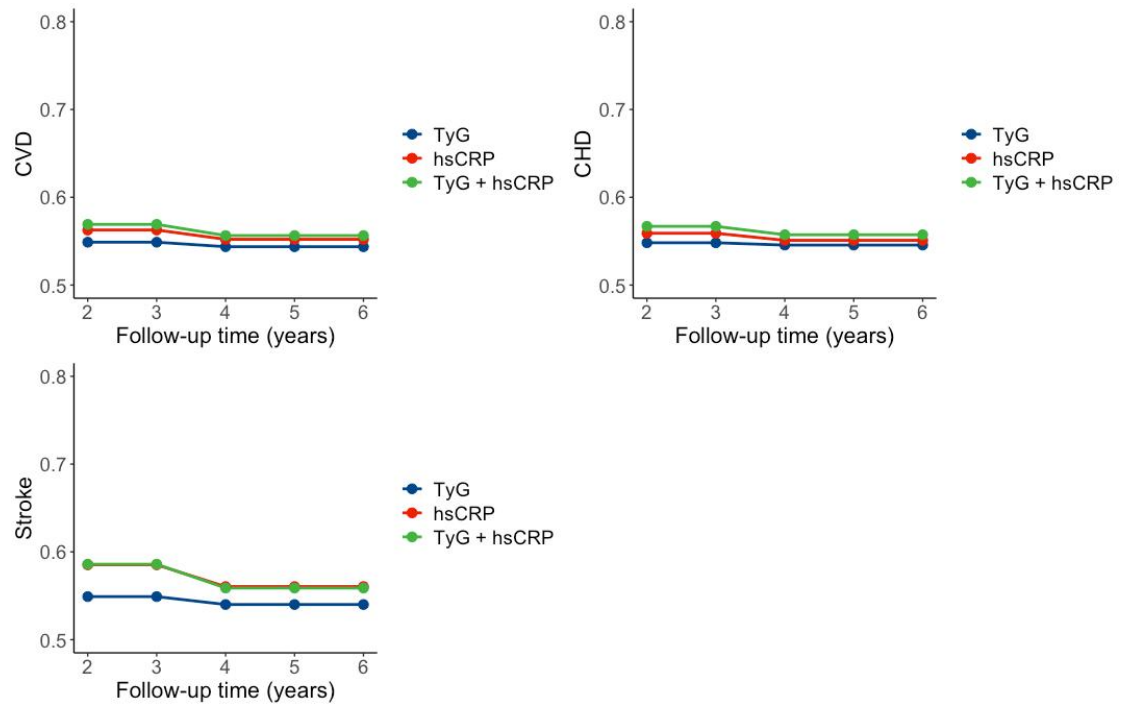

Abbreviations: TyG, triglyceride-glucose index; hsCRP: high-sensitivity C-reactive protein
